# Supplementary material for: Fluorescent carbon dots from water hyacinth as detection sensors for ferric ions: the preparation and optimisation using response surface methodology
Source: Royal Society of Chemistry journal article supplement (doi:10.1039/d2ay01182d), 2022-01-01
Supplement: d2ay01182d1.pdf [file d2ay01182d1.pdf]

## Supporting Information

# **Fluorescent carbon dots from water hyacinth as detection sensors for ferric ion: The preparation and optimisation using response surface methodology**

Qiren Tan<sup>1</sup>, Xiaoying Li<sup>1</sup>, Peng Sun<sup>1, 2</sup>, Jie Zhao<sup>3</sup>, Qinyan Yang<sup>1</sup>, Lumei Wang<sup>1, 2</sup>, Yun Deng<sup>1, 2</sup> and Guoqing Shen<sup>1, 2, \*</sup>

1. School of Agriculture and Biology, Shanghai Jiao Tong University, 800 Dongchuan Road, Shanghai 200240, China.

2. YunNan (Dali) Research Institute of Shanghai Jiao Tong University, Dali, Yunnan 671000, China.

3. Shanghai Pudong Agriculture Technology Extension Centre, Shanghai 201201, China.

\*Correspondence: gqsh@sjtu.edu.cn; Tel.: +86-21-342-061-43

**Table S1** Comparison of different methods for the detection of Fe<sup>3+</sup> using biomass-based CDs as sensing probes.

| Precursors                                         | QY(%) | Linear Range (μM) | LOD (μM) | Reference |
|----------------------------------------------------|-------|-------------------|----------|-----------|
| <i>Prunus avium</i> fruits, aqueous ammonia        | 13    | 0–100             | 0.96     | 1         |
| <i>Chionanthus retusus</i> fruits, aqueous ammonia | 9     | 0–2               | 70       | 2         |
| Cranberry beans                                    | 10.85 | 30–600            | 9.55     | 3         |
| Crop biomass                                       | 3.5   | 0–500             | 5.23     | 4         |
| Milk powder, FeCl <sub>3</sub>                     | 8.73  | 20–500            | 5.13     | 5         |
| Kentucky bluegrass                                 | 7     | 5–25              | 1.4      | 6         |
| Sweet potato                                       | 8.64  | 1–100             | 0.32     | 7         |
| Wheat straw                                        | 9.2   | 1.95–250          | 1.95     | 8         |
| Water hyacinth                                     | 15.12 | 0–35.7            | 2.35     | This work |

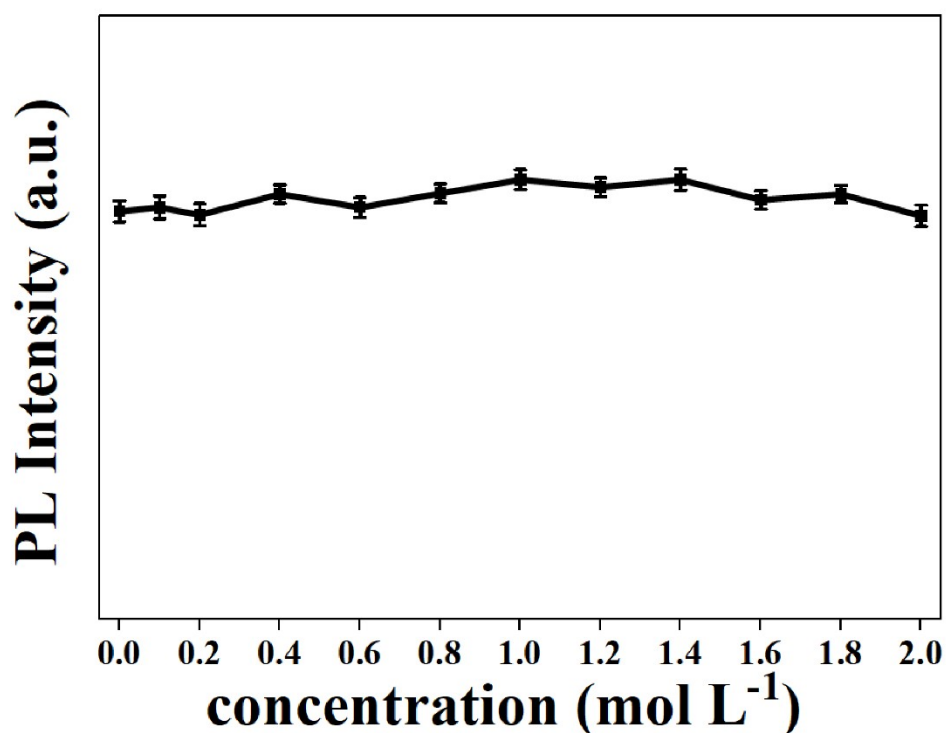

**Fig. S1** Ionic strength effect on the fluorescence of W-CDs.

## References

1. T. N. J. I. Edison, R. Atchudan, J. J. Shim, S. Kalimuthu, B. C. Ahn, and Y. R. Lee, Turn-off fluorescence sensor for the detection of ferric ion in water using green synthesized N-doped carbon dots and its bio-imaging, *J. Photochem. Photobiol., B*, 2016, **158**, 235-242.
2. R. Atchudan, T. N. J. I. Edison, D. Chakradhar, S. Perumal, J. J. Shim, and Y. R. Lee, Facile green synthesis of nitrogen-doped carbon dots using Chionanthus retusus fruit extract and investigation of their suitability for metal ion sensing and biological applications, *Sens. Actuators, B*, 2017, **246**, 497-509.
3. M. Zulfajri, G. Gedda, C. J. Chang, Y. P. Chang, and G. G. Huang, Cranberry beans derived carbon dots as a potential fluorescence sensor for selective detection of Fe<sup>3+</sup> ions in aqueous solution, *ACS Omega*, 2019, **4**, 15382-15392.
4. S. Ding, Y. Gao, B. Ni, and X. Yang, Green synthesis of biomass-derived carbon quantum dots as fluorescent probe for Fe<sup>3+</sup> detection, *Inorg. Chem. Commun.*, 2021, **130**, 108636.
5. P. Fan, C. Liu, C. Hu, F. Li, X. Lin, S. Yang, and F. Xiao, Green and facile synthesis of iron-doped biomass carbon dots as a dual-signal colorimetric and fluorometric probe for the detection of ascorbic acid, *New J. Chem.*, 2022, **46**, 2526-2533.

6. P. Krishnaiah, R. Atchudan, S. Perumal, E. S. Salama, Y. R. Lee, and B. H. Jeon, Utilization of waste biomass of *Poa pratensis* for green synthesis of n-doped carbon dots and its application in detection of  $Mn^{2+}$  and  $Fe^{3+}$ , *Chemosphere*, 2022, **286**, 131764.
7. J. Shen, S. Shang, X. Chen, D. Wang, and Y. Cai, Facile synthesis of fluorescence carbon dots from sweet potato for  $Fe^{3+}$  sensing and cell imaging, *Mater. Sci. Eng.*, 2017, **76**, 856-864.
8. M. Yuan, R. Zhong, H. Gao, W. Li, X. Yun, J. Liu, X. Zhao, G. Zhao, and F. Zhang, One-step, green, and economic synthesis of water-soluble photoluminescent carbon dots by hydrothermal treatment of wheat straw, and their bio-applications in labeling, imaging, and sensing, *Appl. Surf. Sci.*, 2015, **355**, 1136-1144.
